# Supplementary material for: Novel inflammatory cell infiltration scoring system to investigate healthy and footrot affected ovine interdigital skin
Source: PeerJ. 2018 Jul 2;6:e5097. doi: 10.7717/peerj.5097 (PMC6033080; doi:10.7717/peerj.5097)
Supplement: Data S1 — This data set includes for each sample the scores for foot confirmation, clinical status, inflammation, basal membrane, microabscesses, parakeratosis, haemorrhage, congestion as well as % ballooning, D. nodosus load and relative IL1ßmRNA expression. This presented graphically in Figs. 5–9 & Fig. S1. [file peerj-06-5097-s001.xlsx]

## Sheet: Sheet1
Sample code	blinded code	Foot Conformation	Clinical status	Epid. Inflm score (Max)	Epid. Inflm score (Med)	Derm. Inflm. Score (Max)	Derm. Inflm. Score (Med)	BM score Max	BM score Med	Total sample microabscesses	Parak.	Haem.	Congest.	Mean cell ballooning/sample ( %)	pg aprV2 Dn/µg total DNA	Relative IL-1B expression
mm001	ST001	1	FR	4	3	3	2	1	0	yes	0	yes	yes	3.1	0.0001	15.184
mm002	ST005	0	H	2	1	2	2	0	0	yes	0	No	yes	2.8	0.0146066	7.095
mm003	ST007	0	H	2	1	3	2	1	0	yes	1	No	No	4.3	0.00317965	10.4231
mm004	ST011	0	H	1	1	2	2	1	0	yes	0	No	No	2.1	0.00354693	7.32897
mm005	ST029	0	H	2	1	3	2	1	0	yes	2	No	No	5.6	0.00336493	5.94444
mm006	ST059	0	H	4	3	4	3	1	0	yes	2	yes	No	5.8	0.0001	10.3786
mm007	ST061	0	H	2	1	2	2	1	0	yes	2	No	No	3	0.0129374	7.50958
mm008	ST065	0	H	3	1	2	2	1	0	yes	2	No	No	4.3	0.00314645	9.91713
mm009	ST120	0	H	2	1	3	2	1	0	No	1	No	yes	4.8	0.00171368	7.38522
mm010	ST119	0	H	2	1	NA	NA	2	1	No	1	yes	No	4.6	0.0001	7.26741
mm011	ST033	0	H	4	3	4	3	1	0	yes	2	yes	yes	6	0.0910754	11.9459
mm013	ST060	0	H	2	1	3	2	1	0	yes	0	No	yes	3.9	0.00293596	6.15087
mm014	ST002	0	H	2	1	2	2	1	0	yes	2	No	yes	2.3	0.0001	10.1187
mm015	ST006	0	H	2	1	3	2	0	0	yes	2	No	No	6.3	0.0001	12.5803
mm016	ST076	0	H	2	1	2	2	0	0	yes	2	No	No	4	0.00572006	11.7611
mm017	ST013	0	H	2	1	3	2	1	0	No	0	No	No	3.3	0.0001	7.18268
mm018	ST030	0	H	1	1	3	2	2	1	yes	2	yes	yes	2.8	0.0001
mm019	ST062	0	H	2	0	2	1	1	0	No	0	yes	yes	8.1	0.0001
mm020	ST081	0	H	2	1	2	1	0	0	No	0	No	yes	1.7	0.0001	6.32273
mm021	ST008	0	H	1	1	3	2	0	0	No	0	No	No	3.1	0.0001
mm022	ST012	0	H	2	1	3	2	1	0	yes	0	No	yes	6.9	0.120267	8.05201
mm023	ST096	0	H	4	2	4	2	0	0	yes	2	No	yes	3.7	0.0234079	10.3841
mm025	ST041	0	H	4	2	3	3	1	0	yes	2	No	No	7	0.132825	6.78079
mm030	ST063	0	H	2	1	3	2	0	0	yes	2	No	No	3.3	0.0039507	11.733
mm031	ST009	0	H	2	1	3	2	1	0	yes	2	No	yes	2.4	0.021262	12.0277
mm032	ST080	0	FR	3	1	3	2	0	0	yes	2	No	No	1.4	1.20543
mm033	ST117	0	H	2	1	3	2	1	0	No	2	yes	No	5.7	0.0155326
mm034	ST032	0	H	4	2	3	2	0	0	yes	2	No	No	6.9	0.00167494
mm035	ST093	0	H	2	1	2	2	0	0	No	1	yes	No	2.6	0.0001	12.6419
mm036	ST004	0	H	3	2	4	2	0	0	yes	2	No	No	4	0.00111655
mm037	ST064	0	H	3	3	3	2	1	0	yes	2	No	No	4.3	0.535073	12.2057
mm039	ST010	0	H	1	1	3	2	2	0	yes	2	No	yes	1.7	0.0371176	8.36188
mm040	ST034	0	H	3	1	3	2	1	0	yes	2	No	yes	2.3	0.0001	12.0323
mm121	ST094	3	FR	2	1	3	3	1	0	No	2	yes	yes	5	0.778532	10.3309
mm122	ST038	2	FR	2	1	2	2	2	0	No	1	No	No	1.4	0.108962	6.06853
mm123	ST116	3	FR	3	1	2	2	1	0	yes	2	No	No	3.2	1.68354	9.52665
mm124	ST017	3	FR	2	1	2	2	1	0	No	1	No	yes	3.8	0.0247651	7.04537
mm125	ST035	1	H	1	1	2	2	2	0	No	0	No	No	10	0.0001	6.56743
mm126	ST047	1	H	2	2	3	2	2	0	No	2	yes	yes	6	0.00185267	6.67274
mm127	ST018	0	H	2	1	2	2	1	0	No	1	No	No	10.4	0.0001
mm128	ST114	3	FR	2	2	3	2	1	0	No	0	No	yes	4.5	0.0001
mm129	ST079	3	FR	2	1	3	3	0	0	No	0	No	No	5.8	0.0001
mm130	ST014	3	FR	2	2	3	2	1	0	No	0	No	yes	2.3	0.0001	6.68959
mm131	ST115	2	FR	3	1	2	2	1	0	yes	2	No	No	3.2	0.0001
mm132	ST036	1	FR	1	1	2	2	0	0	No	1	No	No	1.8	0.0001	7.00476
mm133	ST015	3	FR	2	1	3	2	1	0	No	0	No	No	0.5	0.00698533	7.44815
mm134	ST022	2	FR	2	1	3	2	1	0	No	0	yes	yes	1	0.0001
mm136	ST092	3	H	2	1	3	2	1	0	No	1	yes	yes	3.4	0.0001
mm139	ST097	0	H	1	1	2	2	1	0	No	2	yes	No	2.7	0.0001
mm140	ST040	3	FR	2	2	3	2	0	0	yes	2	No	yes	7.5	0.0146384	8.03797
mm141	ST112	2	H	1	1	2	1	2	0	No	0	No	No	0.8	0.0001
mm143	ST016	2	H	2	1	3	2	2	0	No	2	No	yes	3.5	0.0001	11.3987
mm144	ST045	3	FR	1	1	2	2	1	0	No	1	No	No	4.8	0.0299166	7.94472
mm146	ST111	3	FR	4	4	3	2	0	0	yes	0	yes	yes	5	0.502196	8.65756
mm147	ST019	0	H	3	2	3	3	0	0	No	1	yes	yes	2.1	0.0588891
mm148	ST100	3	FR	2	2	NA	NA	2	0	yes	2	No	No	7	0.186981
mm149	ST110	3	FR	2	1	4	3	0	0	yes	1	yes	yes	3.5	0.0349394	6.63016
mm150	ST099	2	H	2	1	3	2	0	0	No	1	yes	yes	5.3	0.00237907	6.17751
mm153	ST101	0	H	2	2	2	2	2	0	No	0	No	No	3.1	0.0001
mm154	ST109	1	FR	2	1	3	2	0	0	No	1	No	No	3.1	0.00110883	6.81105
mm156	ST102	1	FR	2	1	3	3	0	0	yes	1	yes	No	1.7	0.00134123
mm157	ST087	0	H	2	1	3	2	0	0	No	0	No	yes	1.1	0.00119479	6.16934
mm159	ST043	3	H	1	1	2	2	1	0	No	1	No	yes	1.6	0.0181411	10.0761
mm160	ST108	3	H	2	1	2	2	2	0	No	1	yes	No	4.3	0.00137748	6.16142
mm164	ST052	1	FR	1	1	2	2	0	0	No	1	No	No	2.7	0.238248	6.73473
mm166	ST023	0	FR	1	1	2	2	0	0	No	1	No	No	2.4	0.0001	5.89685
mm169	ST057	0	FR	2	2	3	2	1	0	yes	2	No	No	1	0.0001	5.89205
mm170	ST085	3	FR	2	1	3	2	1	0	No	1	No	No	2	0.0001	7.29657
mm172	ST071	0	H	2	1	2	2	2	0	No	1	No	yes	2.2	0.0001	10.8203
mm173	ST089	1	H	2	1	3	2	1	0	No	1	yes	No	1.5	0.0001	5.48987
mm174	ST075	1	H	1	1	2	2	0	0	No	0	No	No	1.4	0.0001
mm175	ST107	1	H	1	1	2	2	2	1	No	1	No	yes	0.6	0.0001	5.19598
mm176	ST024	1	FR	2	1	2	2	2	0	No	2	yes	yes	3.5	0.0001	13.1834
mm178	ST070	2	H	2	1	2	2	2	1	No	1	No	yes	0.7	0.0001	9.20968
mm179	ST049	1	H	3	1	2	2	1	0	yes	0	No	yes	3.5	0.0233978	6.20576
mm180	ST056	3	FR	3	2	3	2	1	0	yes	1	No	yes	1.9	1.01889	13.6634
mm183	ST050	3	FR	2	1	2	2	0	0	yes	2	No	No	1.1	0.847027	8.85245
mm184	ST066	0	H	2	1	3	2	1	0	No	0	No	No	3	0.00280596	5.32037
mm189	ST068	1	H	2	2	3	2	1	0	No	2	No	yes	1.1	0.0001	5.00032
mm190	ST028	2	FR	1	1	2	2	0	0	No	2	No	yes	0.3	0.00141676	5.32648
mm191	ST106	1	H	2	1	2	2	1	0	No	2	yes	yes	1.1	0.00131823	5.40604
mm192	ST082	1	FR	2	1	2	2	2	0	No	1	yes	No	1.7	0.00125382	12.6625
mm194	ST054	3	FR	4	3	4	3	0	0	yes	2	yes	No	3.5	0.0001	11.422
mm195	ST026	1	H	2	1	2	2	2	1	No	2	yes	No	2.3	0.0001
mm200	ST027	2	H	2	1	2	2	1	0	yes	2	yes	yes	2.2	0.0436954	7.82614
		Clinical Status
		H= Helathy				BM= Basement membrane										missing data for IL1b due to insufficient amount or quality of RNA
		ID= Interdigital dermatitis
		FR= Footrot				NA	not applicable
		epid= epidermis				No	absent of lesion
		derm=dermis				yes	lesion present
		Max=Maximum
		Med=Medium
