# Supplementary material for: Novel inflammatory cell infiltration scoring system to investigate healthy and footrot affected ovine interdigital skin
Source: PeerJ. 2018 Jul 2;6:e5097. doi: 10.7717/peerj.5097 (PMC6033080; doi:10.7717/peerj.5097)
Supplement: Supplemental Information 1 — This data set outlines the Fisher’s Exact Analysis and to determine confidence intervals with regards to the scores for inflammation, basal membrane, microabscesses, parakeratosis, haemorrhage andcongestion comparing healthy and footrot affected samples. [file peerj-06-5097-s002.xlsx]

## Sheet: Counts & Percen. of histo score
	number of samples scored for different lesions
Clin. Condition	Total sample score no	Epidermal inflam. score (Max)						Dermal inflam. score (Max) (n=54)					BM disruption score (Max)			Parakeratosis			BM disruption score (Max)		Parakeratosis		Haemorr-hages		Congestion
							n
		0	1	2	3	4		0	1	2	3	4	0	1	2	0	1	2	yes	no	yes	no	Yes	No	Yes	No
Healthy	55 (54)	0	10	34	6	5	55	0	0	24	26	4	14	28	13	15	14	26	41 (74.55%[95%CI: 61-85.3%])	14 (25.45%[95%CI: 14.7-39%])	40(72.73%[95%CI: 59-84%])	15(27.27%[95%CI: 16-41%])	17 (30.91%[95%CI: 28.6-62%])	38 (69.09%[95%CI: 38-71.4%])	27 (49%[95%CI:81.6-99.9%])	28 (51%[95%CI: 0.1-18.4%])
Footrot	30(29)	0	5	18	4	3	30	0	0	12	15	2	13	13	4	7	12	11	17 (56.67%[95%CI: 37.4-74.5%])	13(43.33%[95%CI: 25.5-62.6%])	23(76.67%[95%CI: 58-90%])	7(23.33%[95%CI: 10-42%])	9 (30%[95%CI: 22-66%])	21 (70%[95%CI: 34-78%])	12 (40%[95%CI: 41-86.6%])	18 (60%[95%CI: 13.4-59%])
P-value:																			0.1426		0.7984		>0.9999		0.4975
	NOTE
	BM-Basement membrane
	Ic- Intra-cornual
	Sc-Sub-cornual
	Max-Maximum
